# Supplementary material
Source: PubMed Central journal article supplement (PMC1567912)
Supplement: pnas_0602689103_1.pdf [file pnas_0602689103_1.pdf]

YscF MSNFSGFTKGNDAIDAVAQTLKKPADDANKAVNDSIAALKDTPDNPALLADLQHSINKWSVIYNISSTIVRSMKDLMOGILQKFP

MxiH MSVTVPNDDWTLSSLSETFDDGTQTLQGELTLALDKLAKNPSNPQLLAEYQSKLSEYTLYRNAQSNTVKVIKDVDAAIIQNFR

.....1.....2.....3.....4.....5.....6.....7.....8.....
