# Supplementary material
Source: PubMed Central journal article supplement (PMC1567912)

A

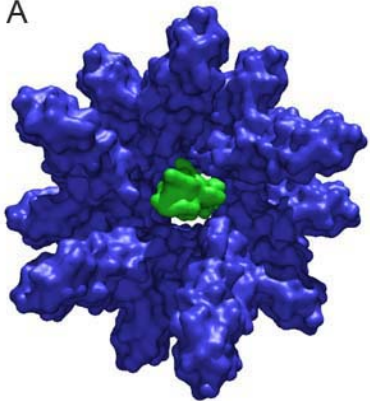

B

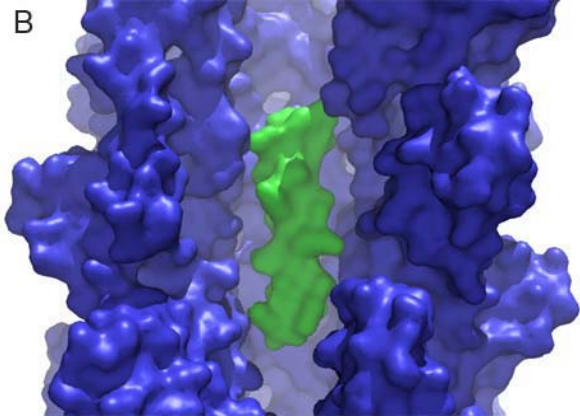

Supplement: pnas_0602689103_2.pdf [file pnas_0602689103_2.pdf]
